# Supplementary material
Source: PubMed Central journal article supplement (PMC8474984)
Supplement: sj-pdf-1-ebm-10.1177_15353702211024597.pdf [file sj-pdf-1-ebm-10.1177_15353702211024597.pdf]

## SUPPLEMENTAL MATERIAL

### Supplemental Questionnaire:

1. Did you come into physical contact with the patient?
2. Did the patient cough or sneeze?
3. Did the patient speak?
4. Was the patient wearing a nasal cannula or high flow nasal cannula?
5. Was the patient receiving a nebulization treatment?
6. Was the patient wearing a surgical mask?
7. Do you remember touching your head, neck, or other area of exposed skin?

### Supplemental Figure:

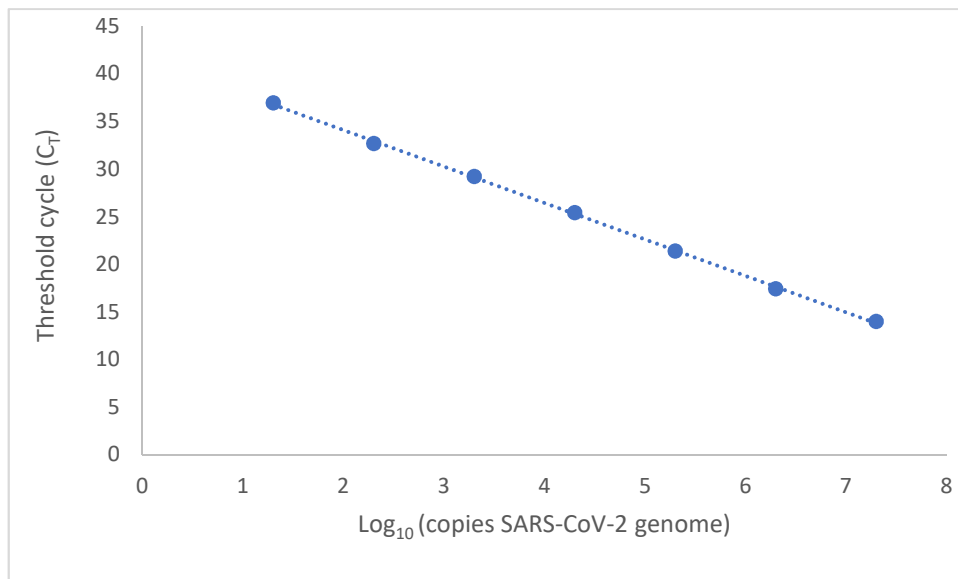

**Supplemental Figure:** Amplification of a 121 bp fragment of the *S*-gene from 2 to  $2 \times 10^7$  copies of SARS-CoV RNA using the Spike RT-qPCR assay. The dynamic range of this assay is within 7 orders of magnitude, with a theoretical lower limit of detection ( $y$ -intercept) at  $C_T=41.76$ . The efficiency of this reaction is 82.45%.
